# Supplementary material for: Deep reinforcement learning for de novo drug design
Source: PubMed Central journal article supplement — Sci Adv. 2018 Jul 25;4(7):eaap7885. doi: 10.1126/sciadv.aap7885 (PMC6059760; doi:10.1126/sciadv.aap7885), 2018-07-25
Supplement: aap7885_SM.pdf [file aap7885_SM.pdf]

## Supplementary Materials for

### Deep reinforcement learning for de novo drug design

Mariya Popova, Olexandr Isayev\*, Alexander Tropsha\*

\*Corresponding author. Email: [alex\\_tropsha@unc.edu](mailto:alex_tropsha@unc.edu) (A.T.); [olexandr@olexandrisayev.com](mailto:olexandr@olexandrisayev.com) (O.I.)

Published 25 July 2018, *Sci. Adv.* **4**, eaap7885 (2018)

DOI: [10.1126/sciadv.aap7885](https://doi.org/10.1126/sciadv.aap7885)

#### This PDF file includes:

Fig. S1. Distribution of SAS for the full ChEMBL21 database (~1.5 million molecules), random subsample of 1M molecules from ZINC15, and generated data set of 1M molecules with baseline generator model  $G$ .

Fig. S2. Reward functions.

Fig. S3. Distributions of SAS for all RL experiments.

Fig. S4. Distribution of residuals and predicted versus observed plots for predictive models.

Fig. S5. Learning curve for generative model.

Fig. S6. Distributions of SMILES's string lengths.

## H2: Supplementary Materials

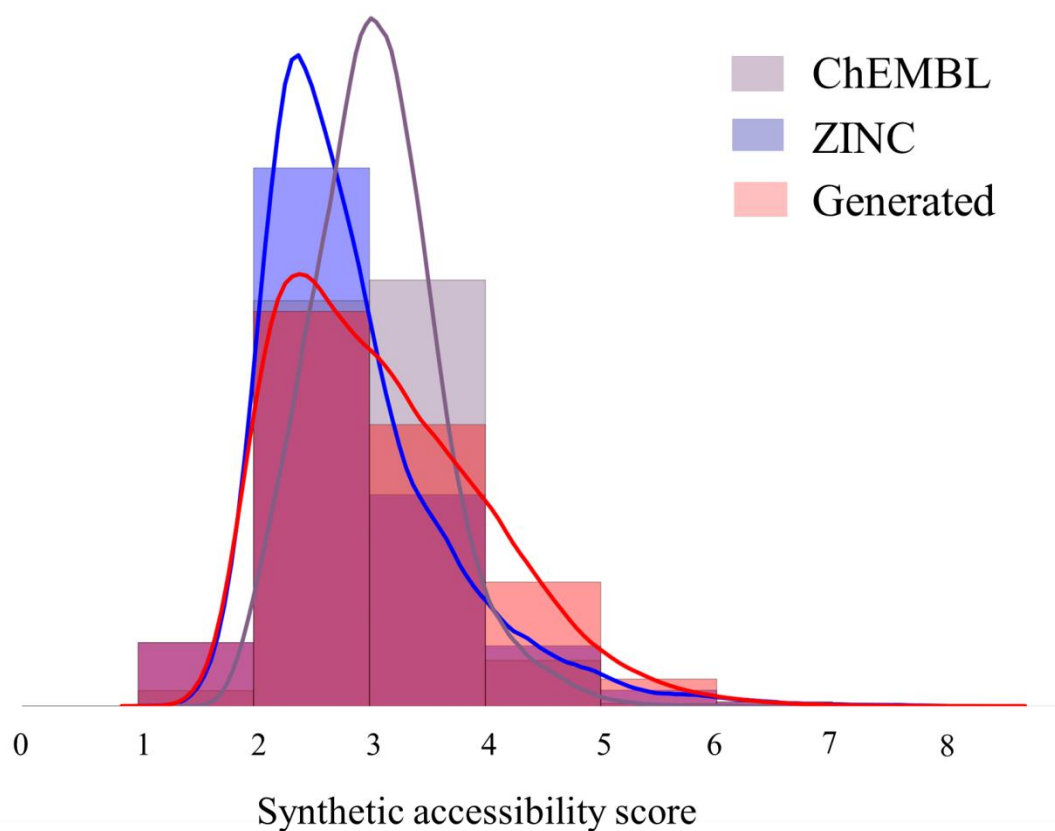

**Fig. S1.** Distribution of SAS for the full ChEMBL21 database (~1.5 million molecules), random subsample of 1M molecules from ZINC15, and generated data set of 1M molecules with baseline generator model *G*.

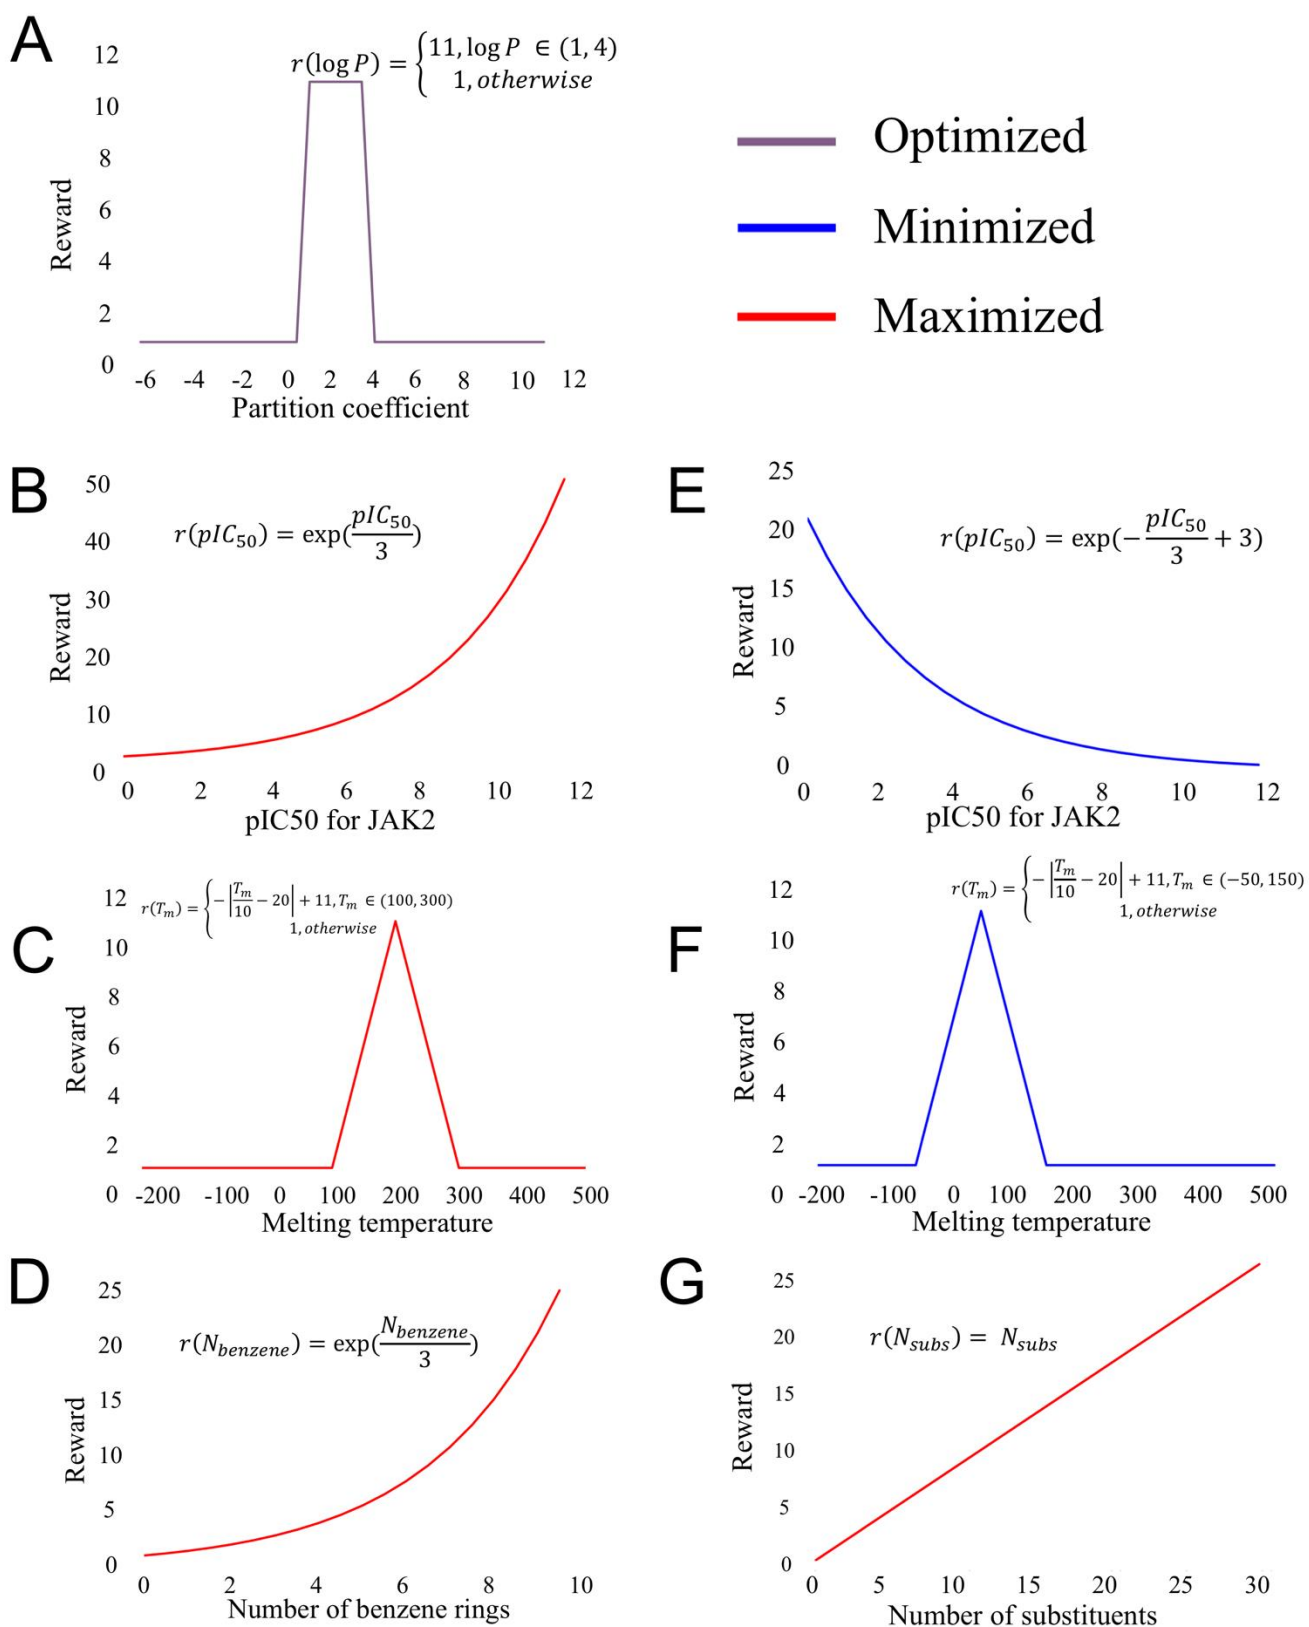

**Fig. S2. Reward functions.** (A) logP optimization (B) pIC<sub>50</sub> for JAK2 maximization (C) Melting temperature maximization (D) Benzene rings maximization (E) pIC<sub>50</sub> for JAK2 minimization (F) Melting temperature minimization (G) Substituent maximization.

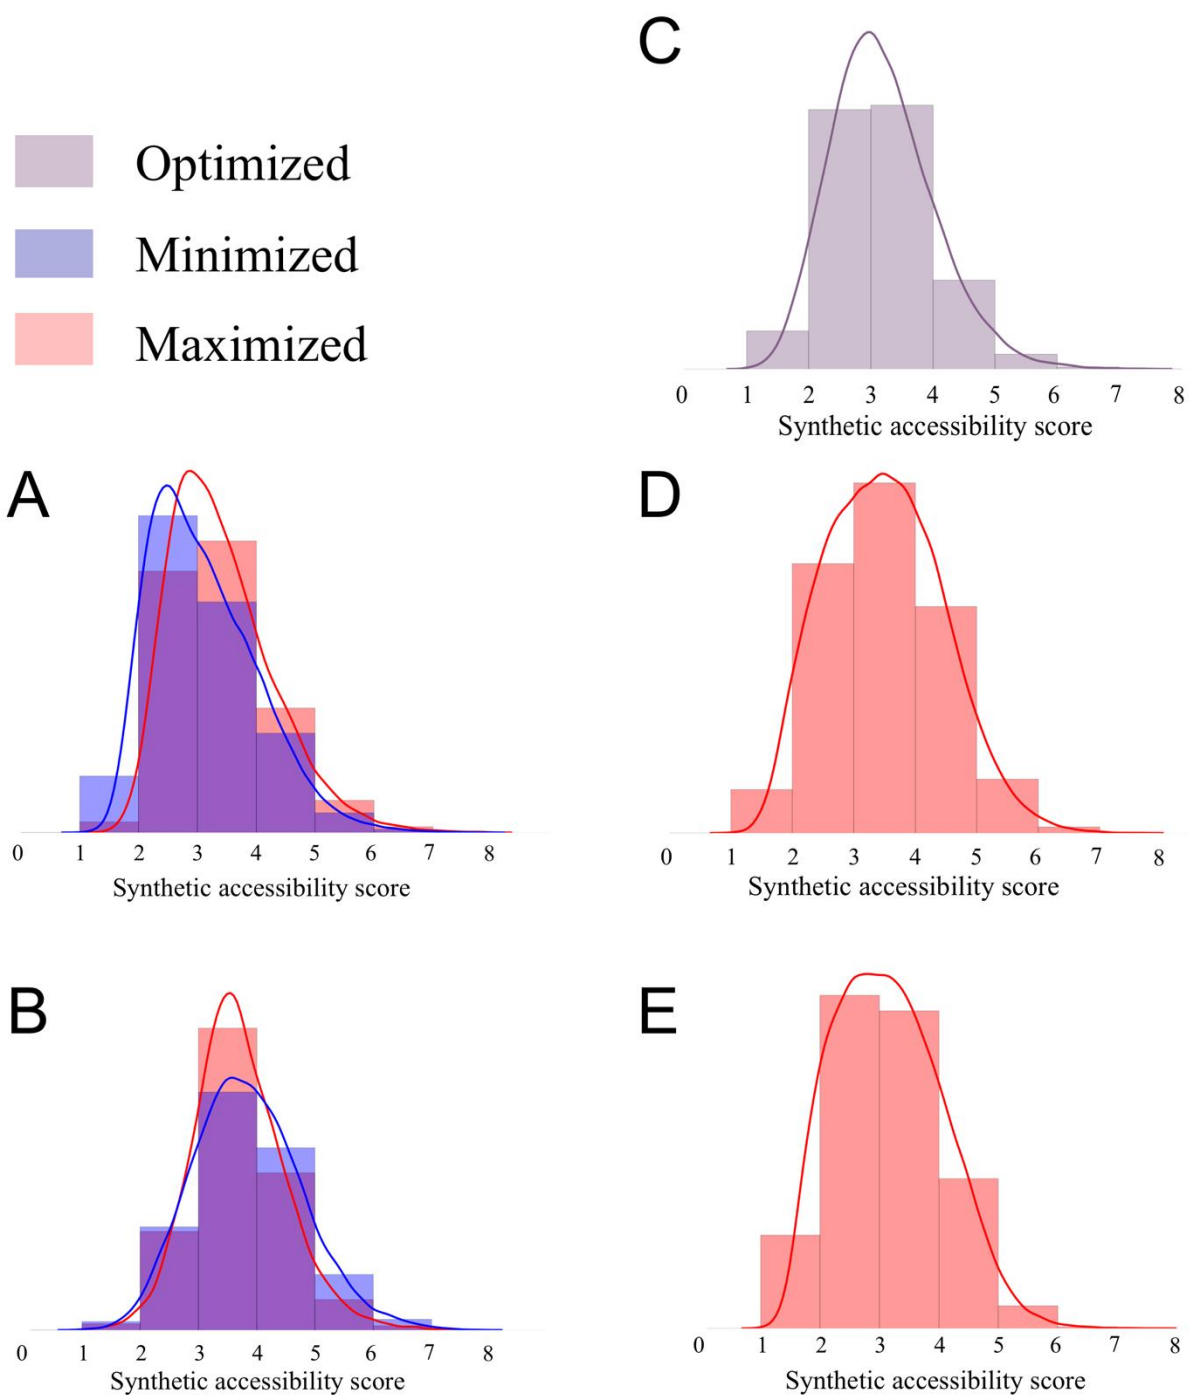

**Fig. S3. Distributions of SAS for all RL experiments. (A) Melting temperature (B) JAK2 inhibition (C) Partition coefficient (D) Number of benzene rings (E) Number of substituents.**

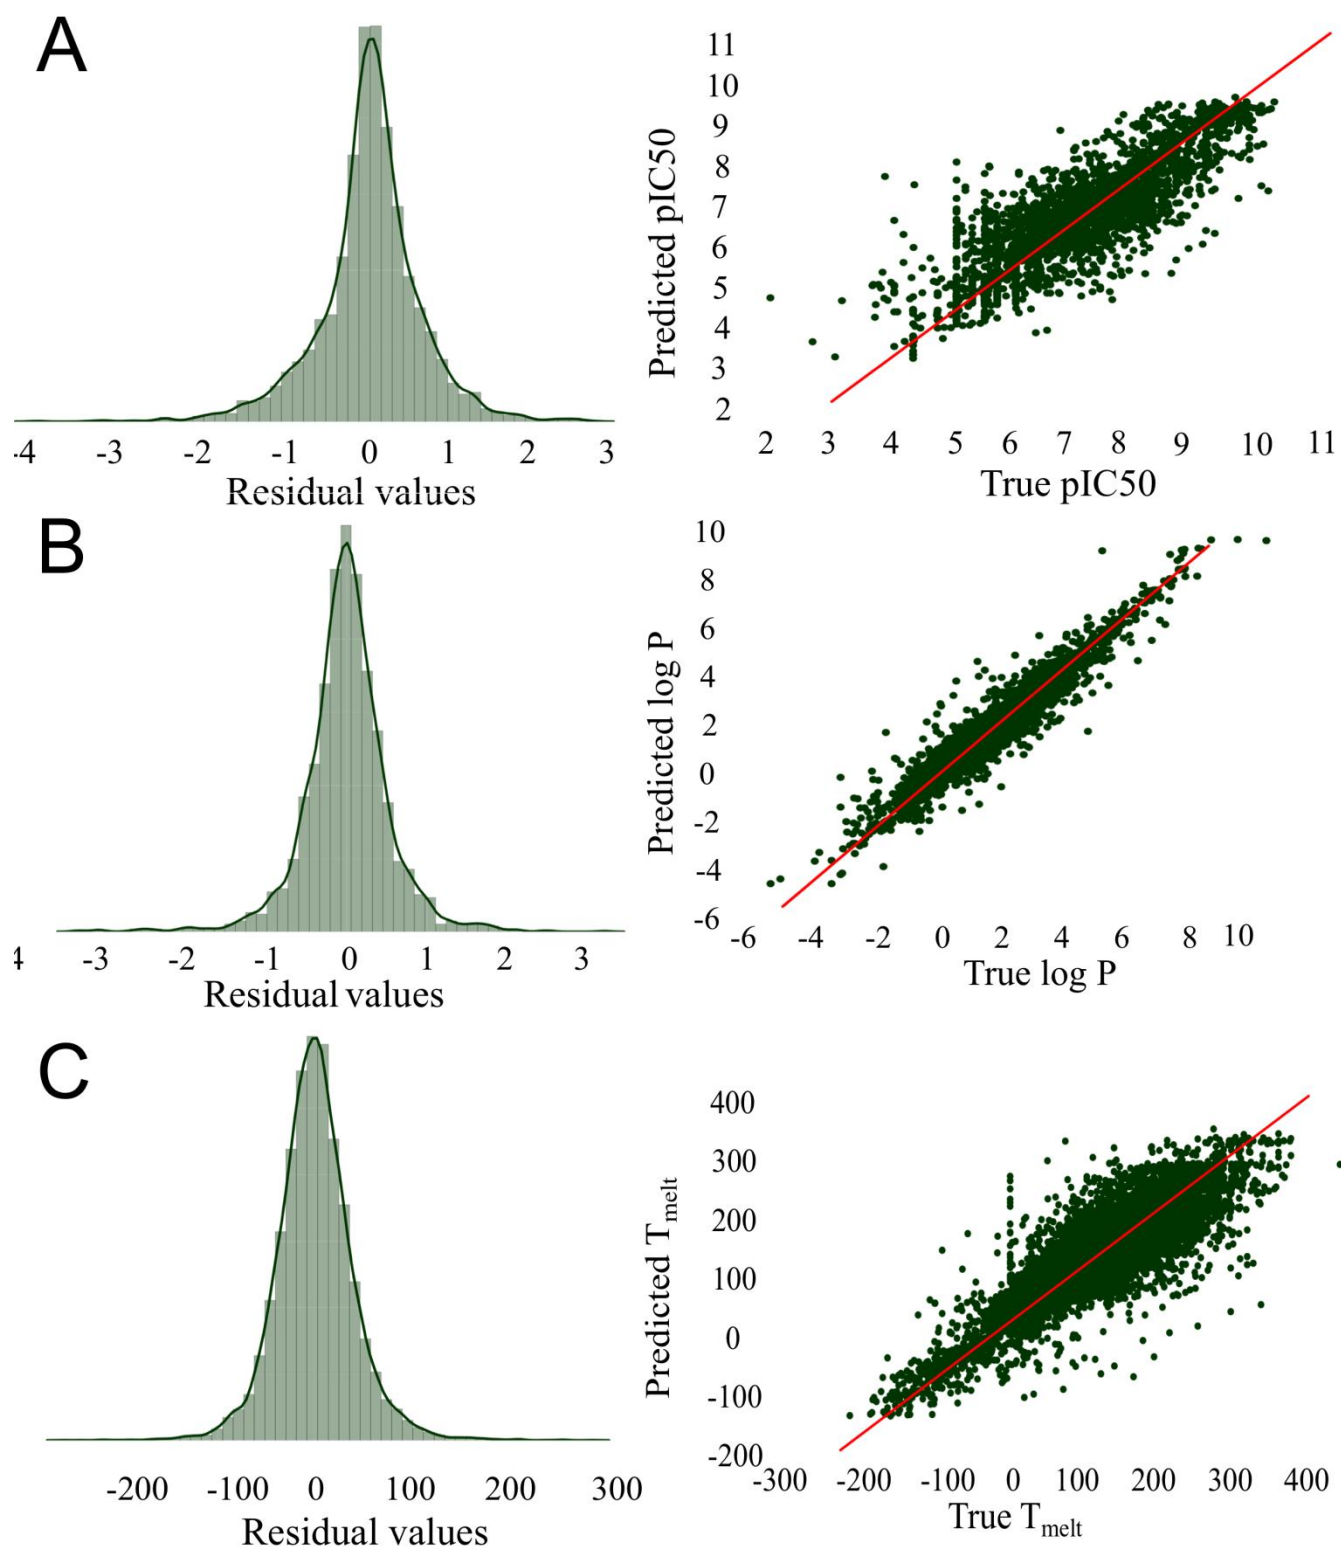

**Fig. S4. Distribution of residuals and predicted versus observed plots for predictive models.** Results are obtained with external Five-fold Cross-validation. All the values are calculated on hold out test datasets (A) Melting temperature (B) logP (C) pIC<sub>50</sub> for JAK2.

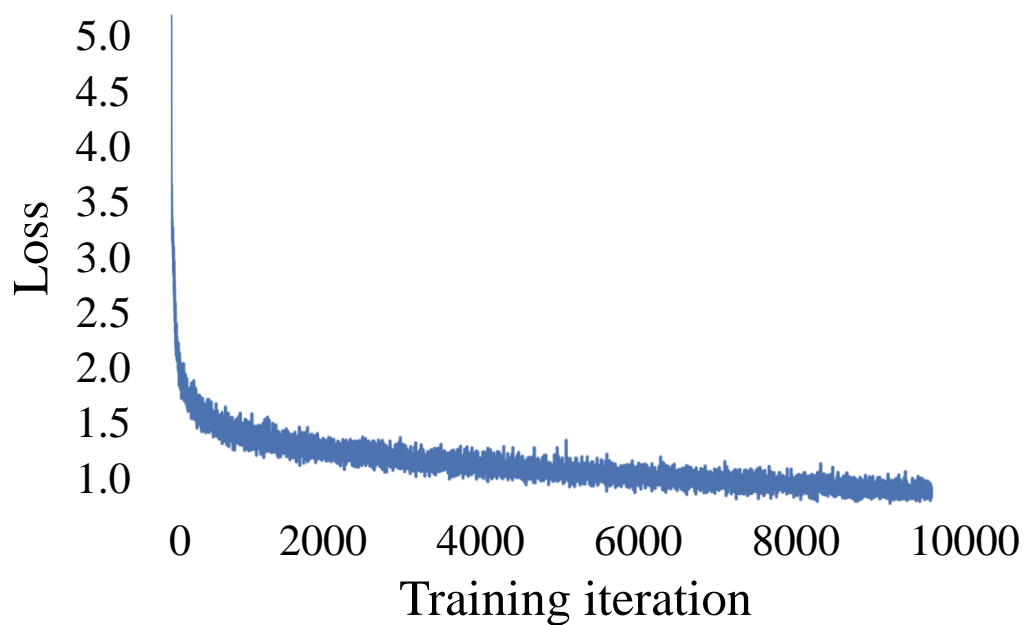

**Fig. S5. Learning curve for generative model.**

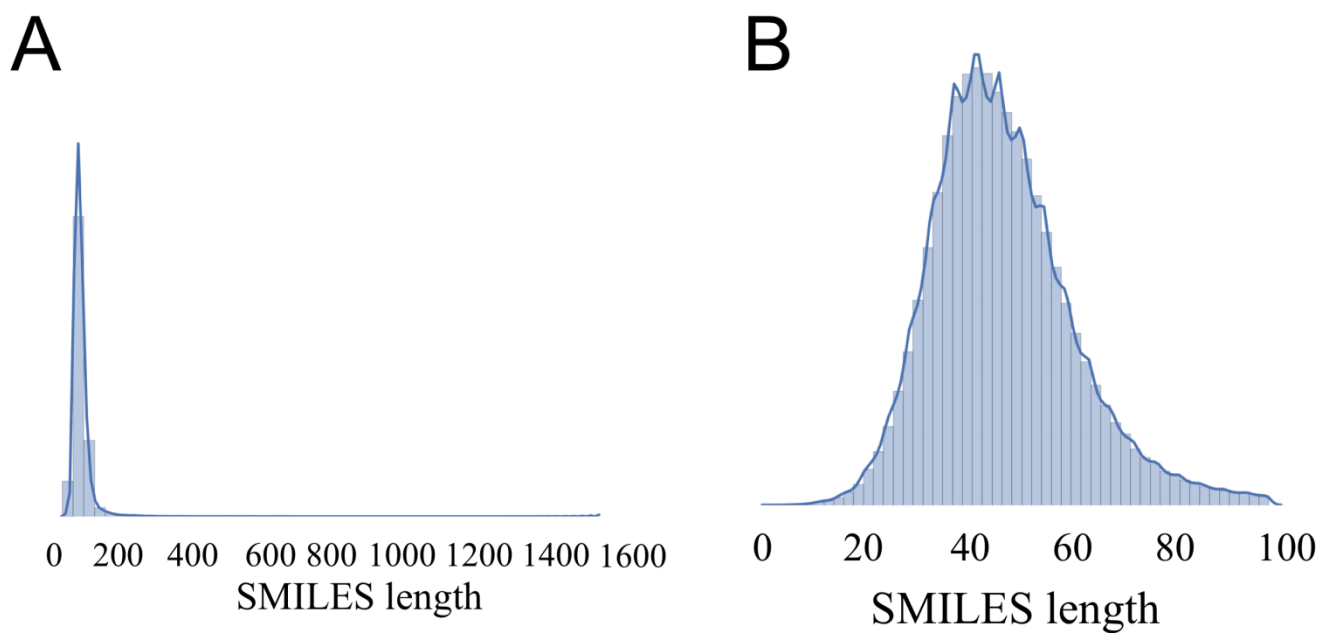

**Fig. S6. Distributions of SMILES's string lengths. (A) Initial (B) Truncated.**
